# Supplementary material for: Synthesis and characterization of dinuclear NHC–palladium complexes and their applications in the Hiyama reactions of aryltrialkyoxysilanes with aryl chlorides
Source: Royal Society of Chemistry journal article supplement (doi:10.1039/c2dt31174g), 2012-01-01

Electronic Supplementary Material (ESI) for Dalton Transactions

This journal is © The Royal Society of Chemistry 2012

## Supplementary Information

### Synthesis and Characterization of Dinuclear NHC–Palladium Complexes and Their Applications in the Hiyama Reactions of Aryltrialkoxysilanes with Aryl Chlorides

Jin Yang,<sup>a</sup> and Lei Wang<sup>\*a,b</sup>

<sup>a</sup> Department of Chemistry, Huaibei Normal University, Huaibei, Anhui 235000, P R China

Tel: + 86-561-3802-069 Fax: + 86-561-3090-518 E-mail: leiwang@chnu.edu.cn

<sup>b</sup> State Key Laboratory of Organometallic Chemistry, Shanghai Institute of Organic Chemistry, Chinese Academy of Sciences, Shanghai 200032, P R China

---

## 1. Characterization data for the products

### 4-Methoxybiphenyl

<sup>1</sup>H NMR (400 MHz, CDCl<sub>3</sub>): δ = 7.59–7.55 (4H, m), 7.44 (2H, t, *J* = 7.6 Hz), 7.33 (1H, t, *J* = 7.6 Hz), 7.01 (2H, d, *J* = 8.8 Hz), 3.87 (3H, s). <sup>13</sup>C NMR (100 MHz, CDCl<sub>3</sub>): δ = 159.1, 140.8, 133.7, 128.7, 128.1, 126.7, 126.6, 114.2, 55.3.

### 3-Methoxybiphenyl

<sup>1</sup>H NMR (400 MHz, CDCl<sub>3</sub>): δ = 7.52 (2H, d, *J* = 7.2 Hz), 7.40 (2H, t, *J* = 7.2 Hz), 7.32–7.29 (3H, m), 7.04–6.96 (2H, m), 3.78 (3H, s). <sup>13</sup>C NMR (100 MHz, CDCl<sub>3</sub>): δ = 156.4, 138.5, 130.8, 130.6, 129.5, 128.6, 127.9, 126.9, 120.8, 111.1, 55.5.

### 2-Methoxybiphenyl

<sup>1</sup>H NMR (400 MHz, CDCl<sub>3</sub>): δ = 7.58–7.56 (2H, m), 7.43–7.39 (2H, m), 7.35–7.31 (2H, m), 7.17–7.12 (2H, m), 6.87 (1H, dd, *J* = 8.4 and 2.4 Hz), 3.82 (3H, s). <sup>13</sup>C NMR

(100 MHz, CDCl<sub>3</sub>):  $\delta$  = 159.9, 142.7, 141.0, 129.7, 128.7, 127.4, 127.1, 119.6, 112.8, 112.6, 55.2.

#### **4-Nitrobiphenyl**

<sup>1</sup>H NMR (400 MHz, CDCl<sub>3</sub>):  $\delta$  = 8.30 (2H, d,  $J$  = 8.8 Hz), 7.74 (2H, d,  $J$  = 8.8 Hz), 7.65–7.62 (2H, m), 7.53–7.49 (2H, m), 7.47–7.44 (1H, m). <sup>13</sup>C NMR (100 MHz, CDCl<sub>3</sub>):  $\delta$  = 147.6, 147.0, 138.7, 129.1, 128.9, 127.8, 127.4, 124.1.

#### **3-Nitrobiphenyl**

<sup>1</sup>H NMR (400 MHz, CDCl<sub>3</sub>):  $\delta$  = 8.46 (1H, s), 8.22–8.20 (1H, m), 7.93 (1H, d,  $J$  = 8.0 Hz), 7.65–7.62 (3H, m), 7.53–7.49 (2H, m), 7.46–7.43 (1H, m). <sup>13</sup>C NMR (100 MHz, CDCl<sub>3</sub>):  $\delta$  = 148.7, 142.8, 138.6, 132.9, 129.6, 129.1, 128.5, 127.1, 122.0, 121.9.

#### **1,1'-Biphenyl-4-carbonitrile**

<sup>1</sup>H NMR (400 MHz, CDCl<sub>3</sub>):  $\delta$  = 7.74–7.67 (4H, m), 7.59 (2H, d,  $J$  = 8.0 Hz), 7.50–7.41 (3H, m). <sup>13</sup>C NMR (100 MHz, CDCl<sub>3</sub>):  $\delta$  = 145.6, 139.1, 132.6, 129.1, 128.6, 127.7, 127.2, 118.9, 110.9.

#### **1-(4-Biphenyl)ethanone**

<sup>1</sup>H NMR (400 MHz, CDCl<sub>3</sub>):  $\delta$  = 8.03 (2H, d,  $J$  = 8.4 Hz), 7.68 (2H, d,  $J$  = 8.4 Hz), 7.62 (2H, d,  $J$  = 7.6 Hz), 7.48–7.45 (2 H, m), 7.40 (1H, t,  $J$  = 7.6 Hz), 2.63 (3H, s). <sup>13</sup>C NMR (100 MHz, CDCl<sub>3</sub>):  $\delta$  = 197.7, 145.7, 139.8, 135.8, 128.9, 128.9, 128.2, 127.2, 127.1, 26.7.

#### **4-(Ethoxycarbonyl)-1,1'-biphenyl**

<sup>1</sup>H NMR (400 MHz, CDCl<sub>3</sub>):  $\delta$  = 8.07 (2H, d,  $J$  = 8.4 Hz), 7.62–7.57 (4H, m), 7.44–7.40 (2H, m), 7.35 (1H, t,  $J$  = 7.6 Hz), 4.36 (2H, q,  $J$  = 7.2 Hz), 1.37 (3H, t,  $J$  = 7.2 Hz). <sup>13</sup>C NMR (100 MHz, CDCl<sub>3</sub>):  $\delta$  = 166.5, 145.5, 140.1, 130.1, 129.2, 128.9, 128.1, 127.3, 127.0, 61.0, 14.4.

#### 4-Fluoro-1,1'-biphenyl

$^1\text{H}$  NMR (400 MHz,  $\text{CDCl}_3$ ):  $\delta = 7.49\text{--}7.46$  (4H, m), 7.38–7.34 (2H, m), 7.27 (1H, t,  $J = 7.6$  Hz), 7.08–7.03 (2H, m).  $^{13}\text{C}$  NMR (100 MHz,  $\text{CDCl}_3$ ):  $\delta = 162.5$  (d,  $^1J_{\text{CF}} = 244.7$  Hz), 140.3, 137.4 ( $^4J_{\text{CF}} = 3.3$  Hz), 128.8, 128.7 ( $^3J_{\text{CF}} = 8.0$  Hz), 127.2, 127.0, 115.6 ( $^2J_{\text{CF}} = 21.3$  Hz).

#### Biphenyl

$^1\text{H}$  NMR (400 MHz,  $\text{CDCl}_3$ ):  $\delta = 7.49$  (4H, d,  $J = 8.0$  Hz), 7.35–7.32 (4H, m), 7.26–7.22 (2H, m).  $^{13}\text{C}$  NMR (100 MHz,  $\text{CDCl}_3$ ):  $\delta = 141.2, 128.7, 127.2, 127.2$ .

#### 4-Methylbiphenyl

$^1\text{H}$  NMR (400 MHz,  $\text{CDCl}_3$ ):  $\delta = 7.46$  (2H, d,  $J = 7.6$  Hz), 7.38 (2H, d,  $J = 8.0$  Hz), 7.32–7.29 (2H, m), 7.20 (1H, t,  $J = 7.6$  Hz), 7.13 (2H, d,  $J = 7.6$  Hz), 2.28 (3H, s).  $^{13}\text{C}$  NMR (100 MHz,  $\text{CDCl}_3$ ):  $\delta = 141.1, 138.3, 137.0, 129.5, 128.7, 127.0, 126.9, 21.1$ .

#### 2-Phenylpyridine

$^1\text{H}$  NMR (400 MHz,  $\text{CDCl}_3$ ):  $\delta = 8.60\text{--}8.58$  (1H, m), 7.90 (2H, d,  $J = 7.2$  Hz), 7.59–7.58 (2H, m), 7.39–7.35 (2H, m), 7.32–7.28 (1H, m), 7.10–7.07 (1H, m).  $^{13}\text{C}$  NMR (100 MHz,  $\text{CDCl}_3$ ):  $\delta = 157.3, 149.5, 139.2, 136.6, 128.8, 128.6, 126.8, 121.9, 120.4$ .

#### 3-Phenylpyridine

$^1\text{H}$  NMR (400 MHz,  $\text{CDCl}_3$ ):  $\delta = 8.75$  (1H, s), 8.50–8.49 (1H, m), 7.78–7.76 (1H, m), 7.48 (2H, d,  $J = 7.2$  Hz), 7.40–7.36 (2H, t,  $J = 7.2$  Hz), 7.32–7.27 (2H, m).  $^{13}\text{C}$  NMR (100 MHz,  $\text{CDCl}_3$ ):  $\delta = 148.4, 148.3, 137.8, 136.6, 134.3, 129.0, 128.1, 127.1, 123.5$ .

## 2. $^1\text{H}$ NMR and $^{13}\text{C}$ NMR spectra

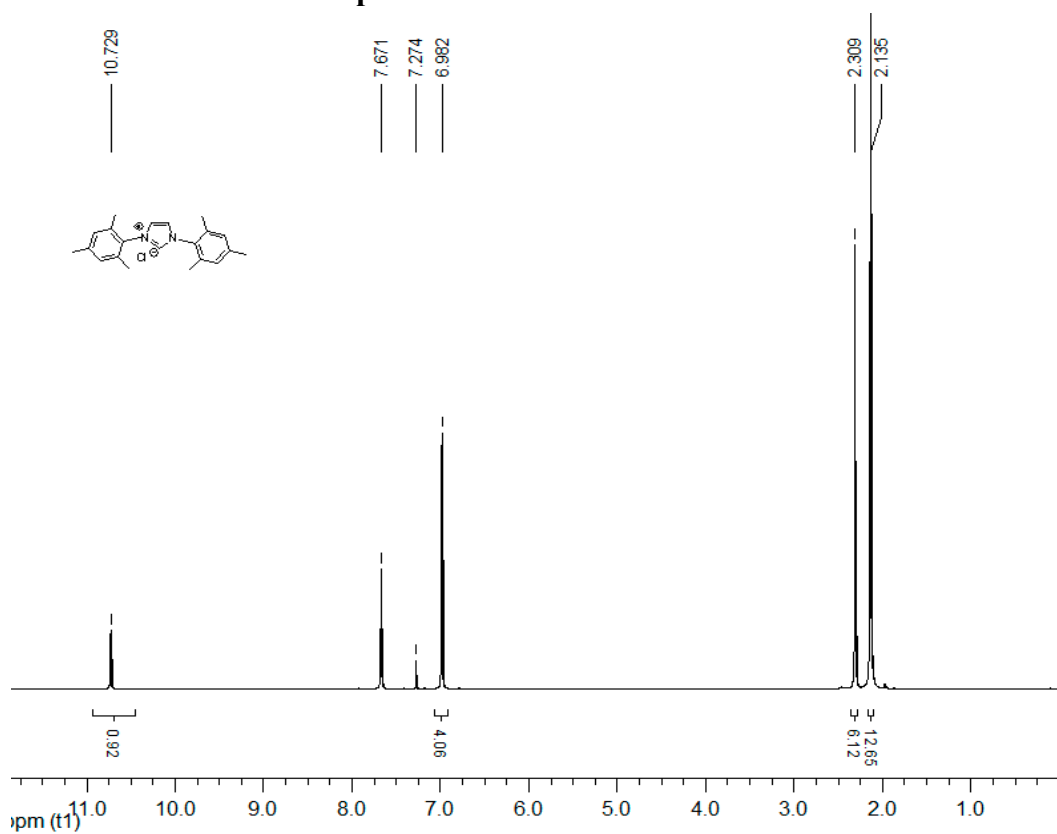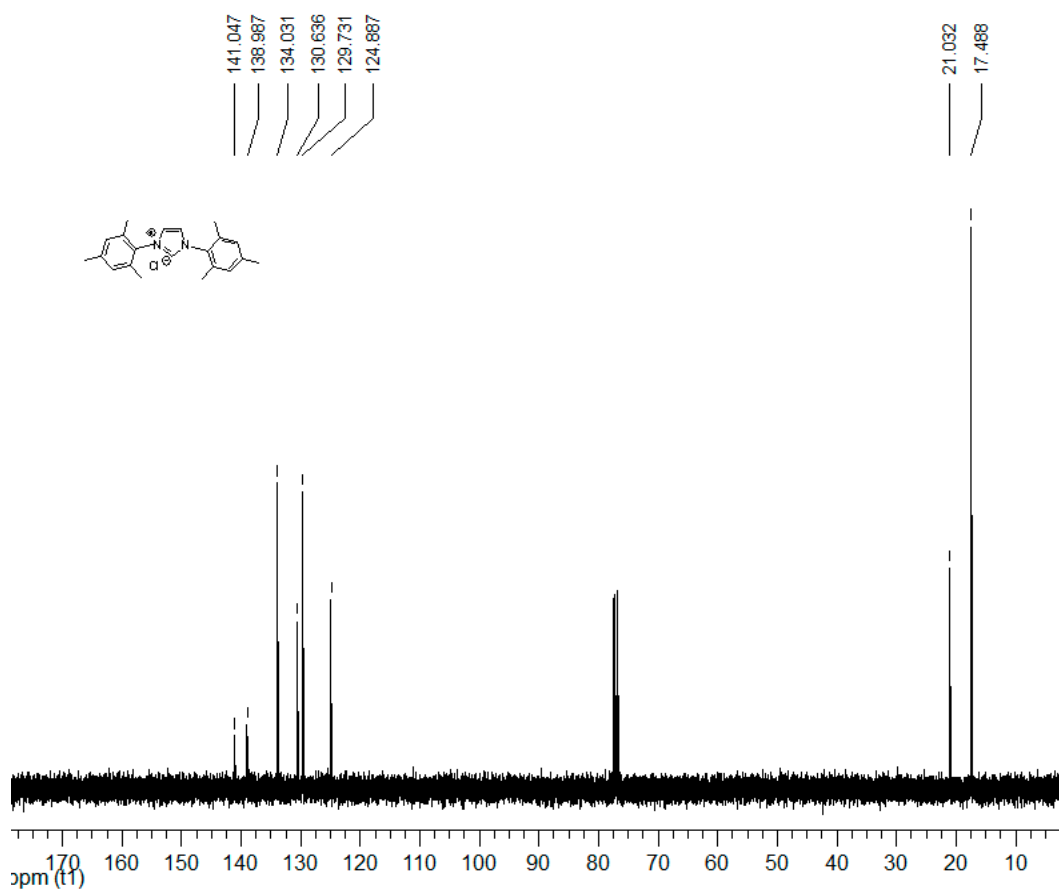

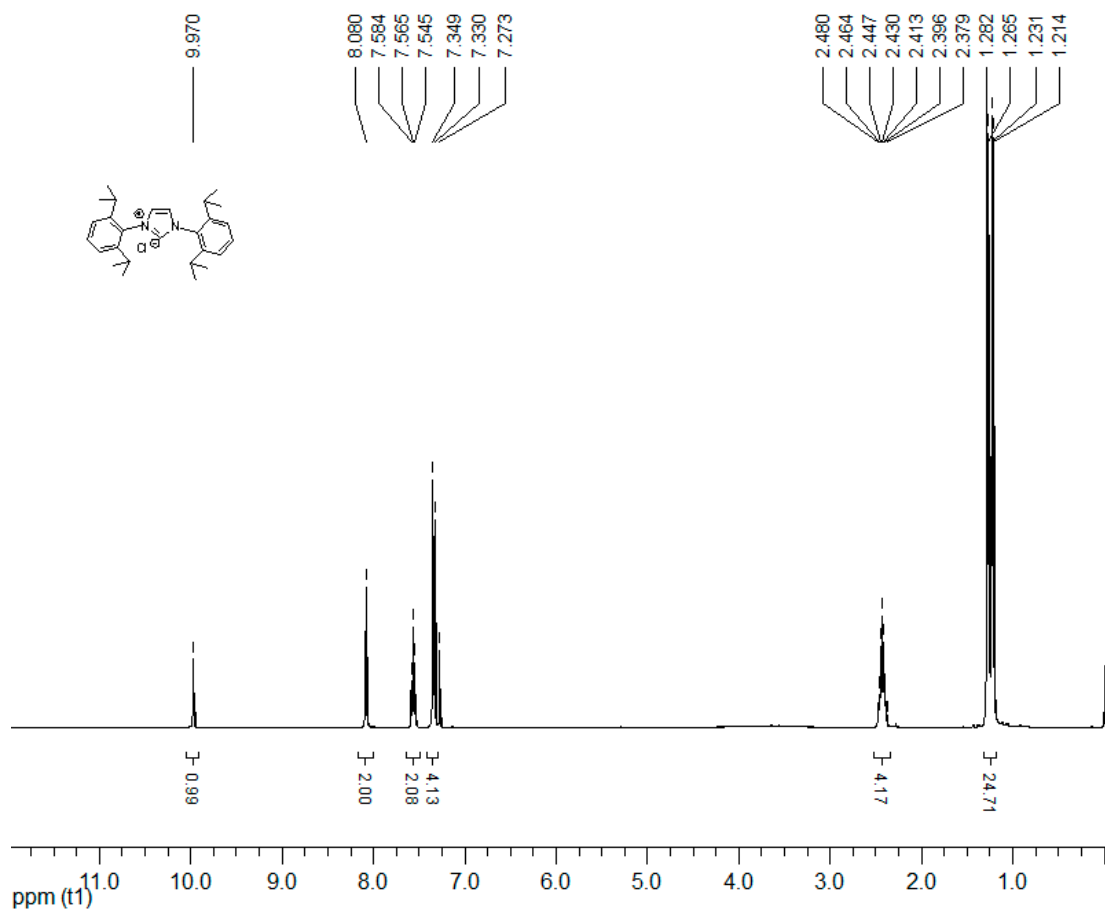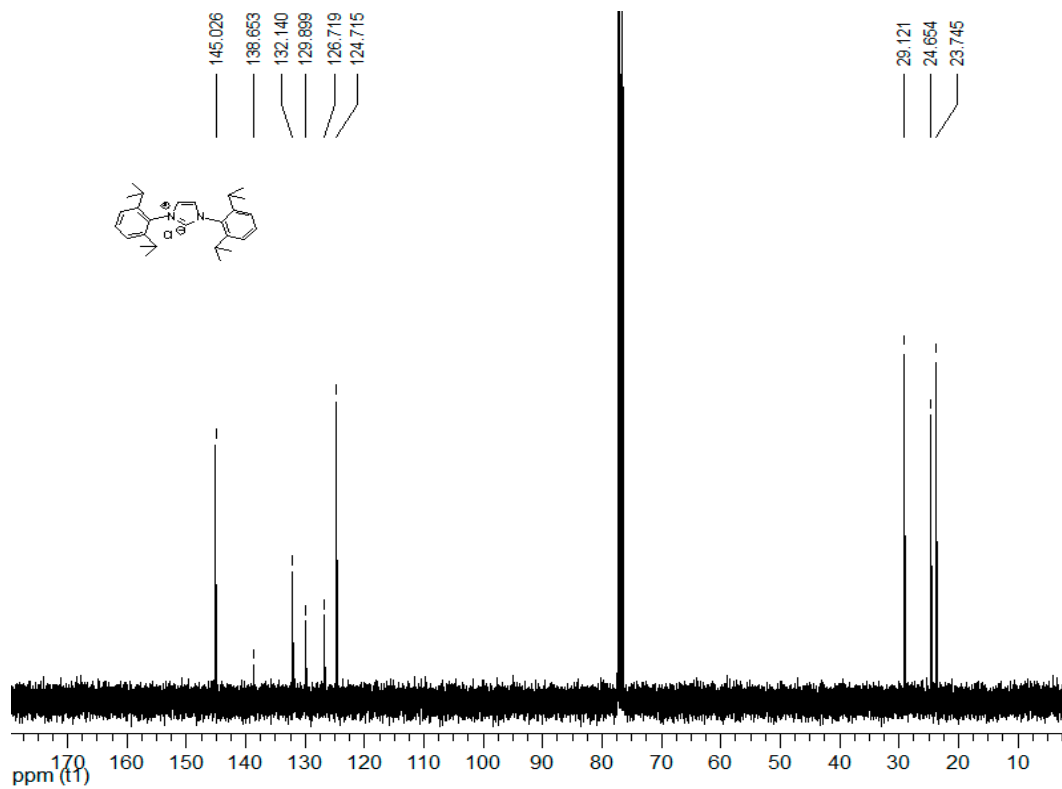

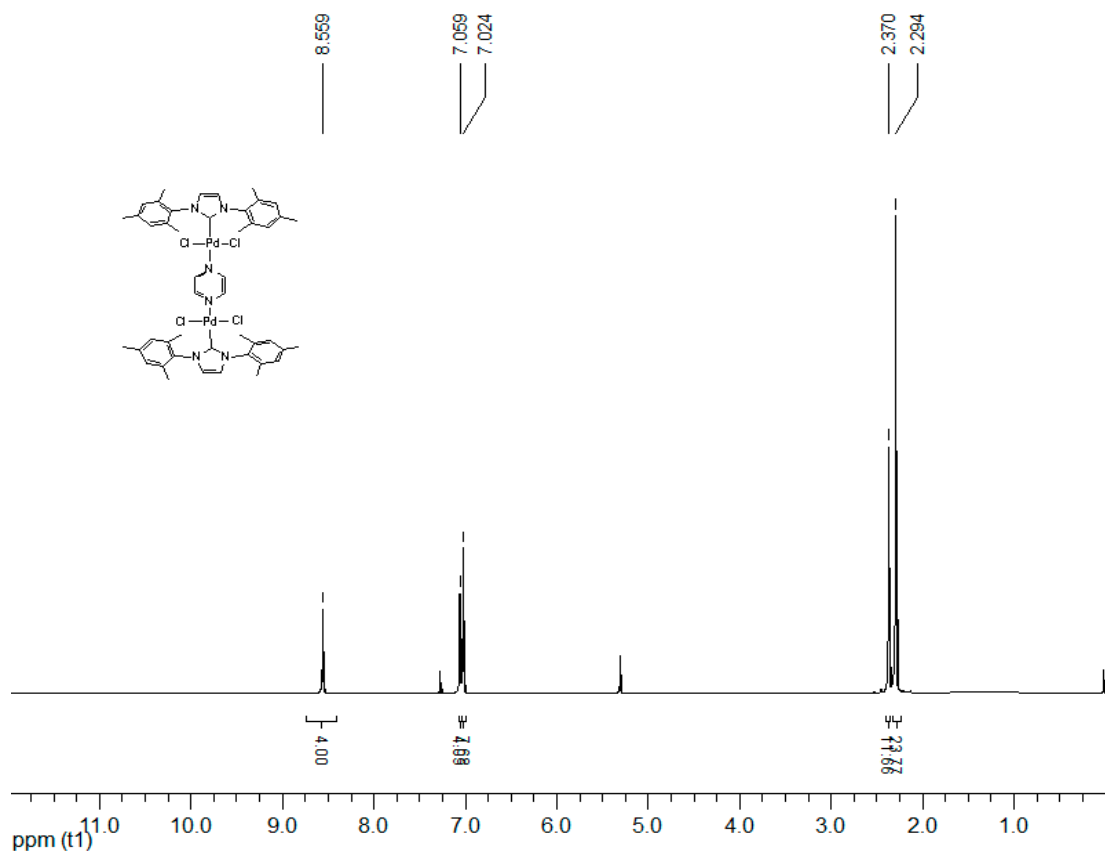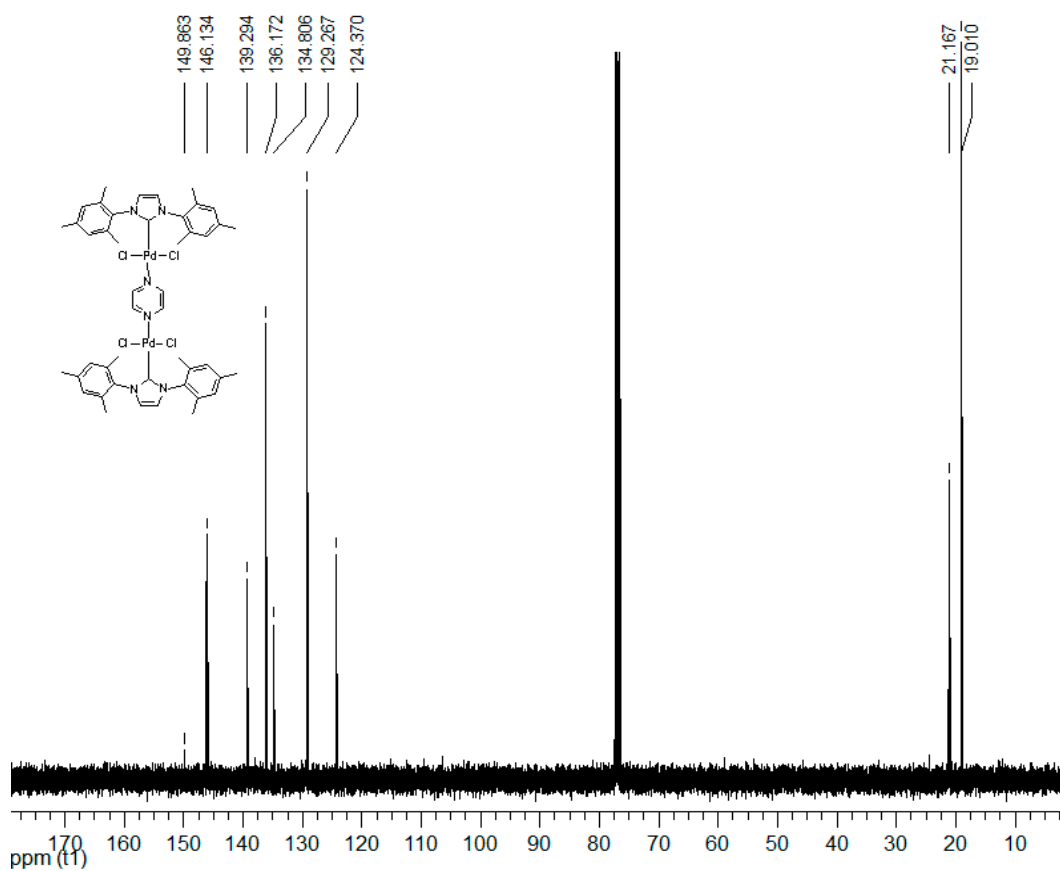

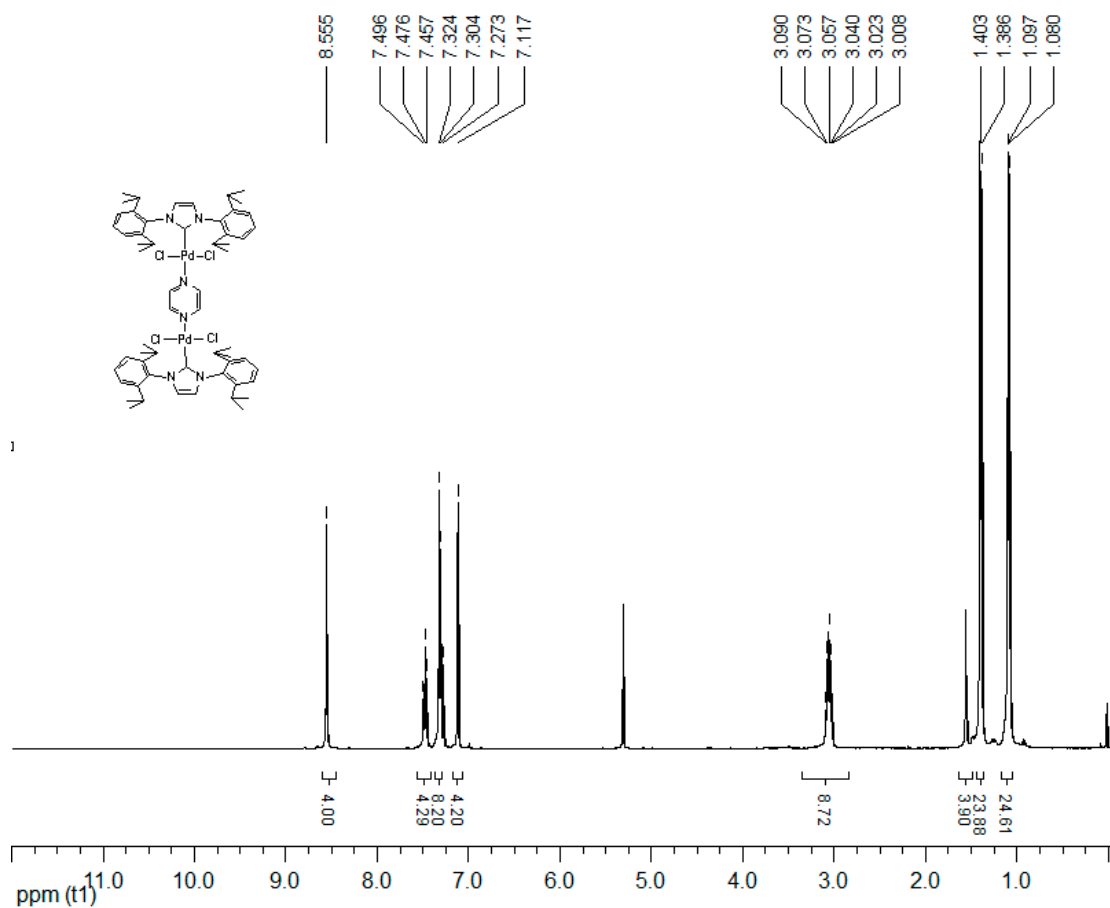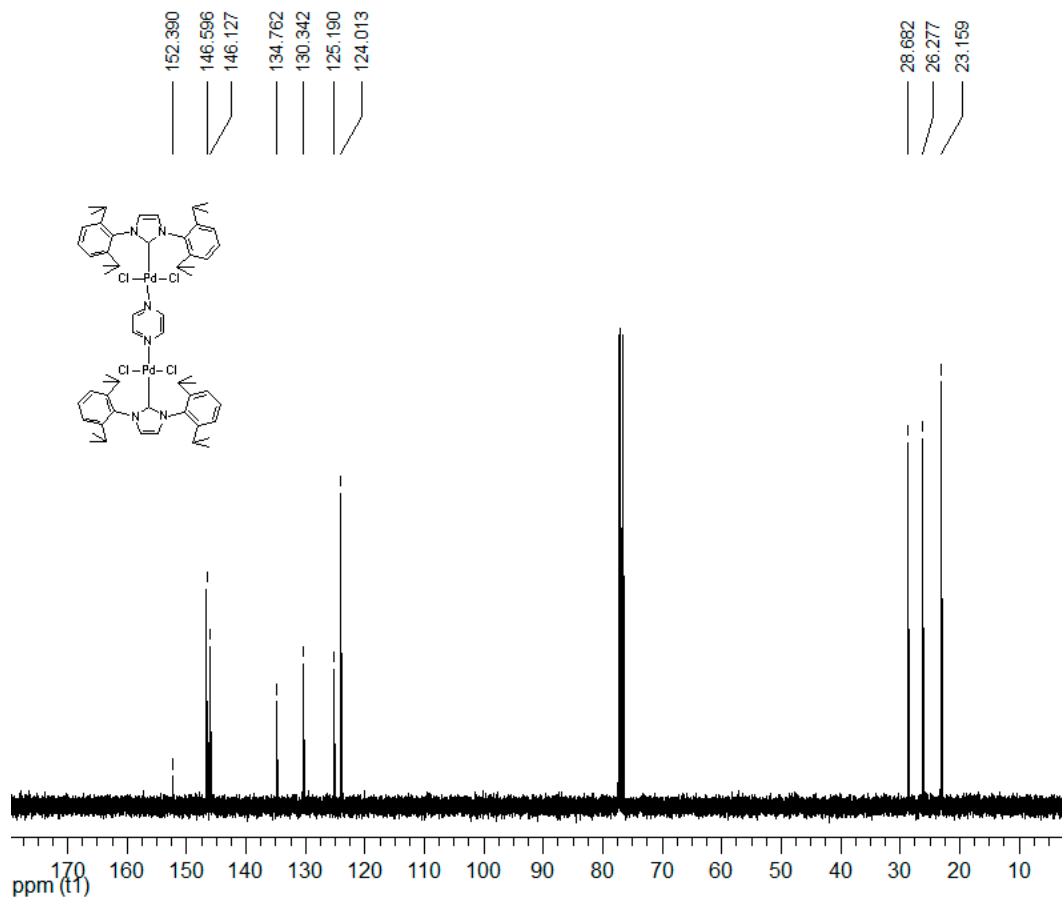

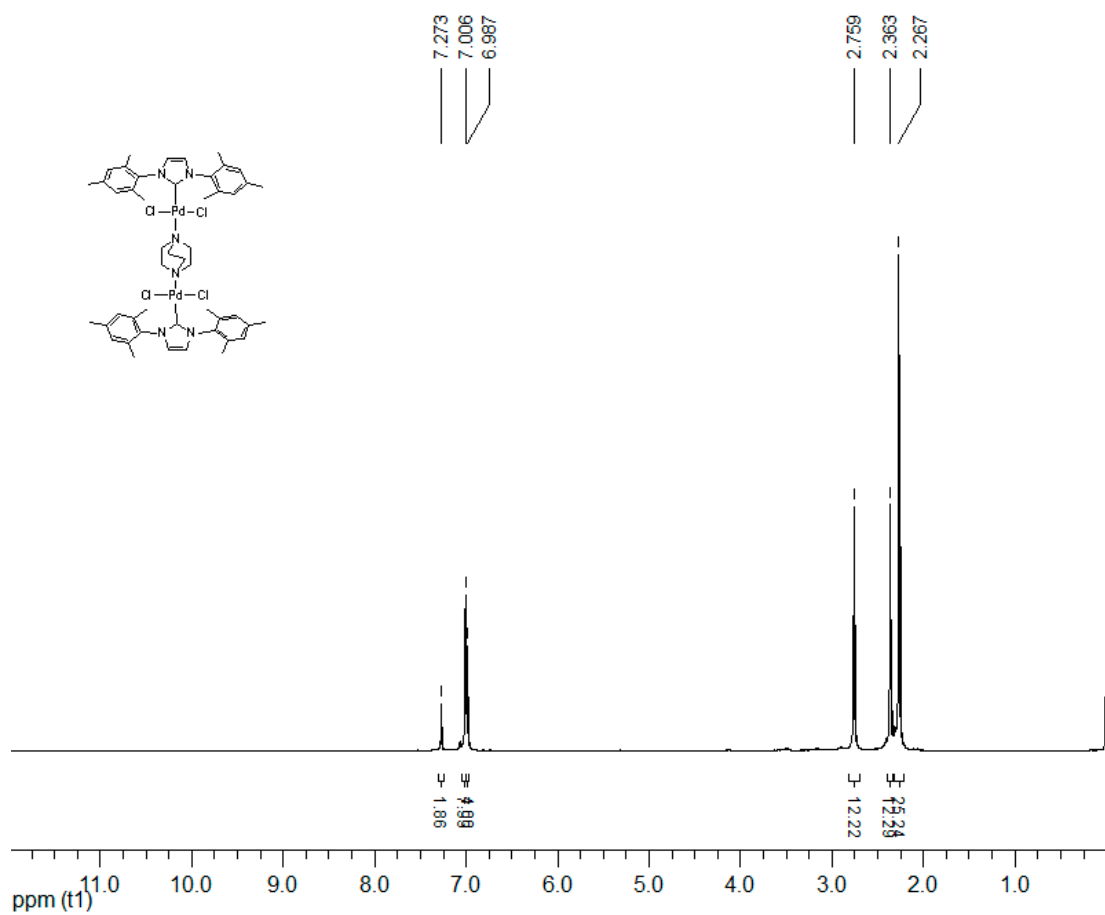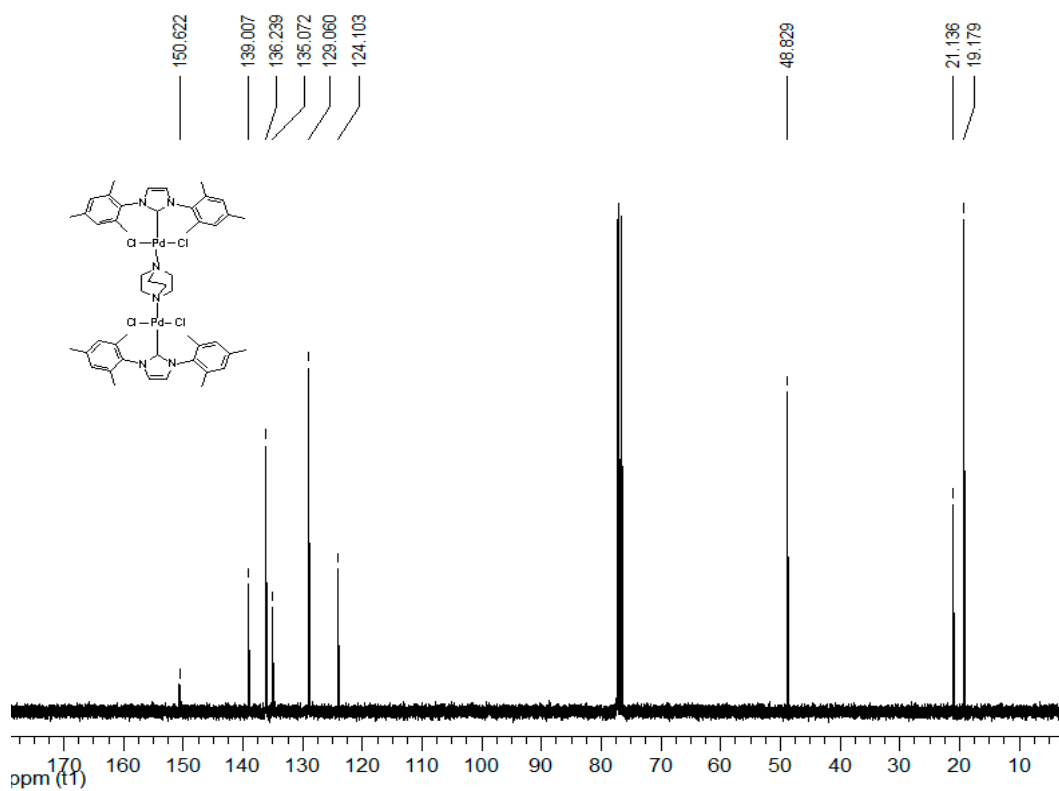



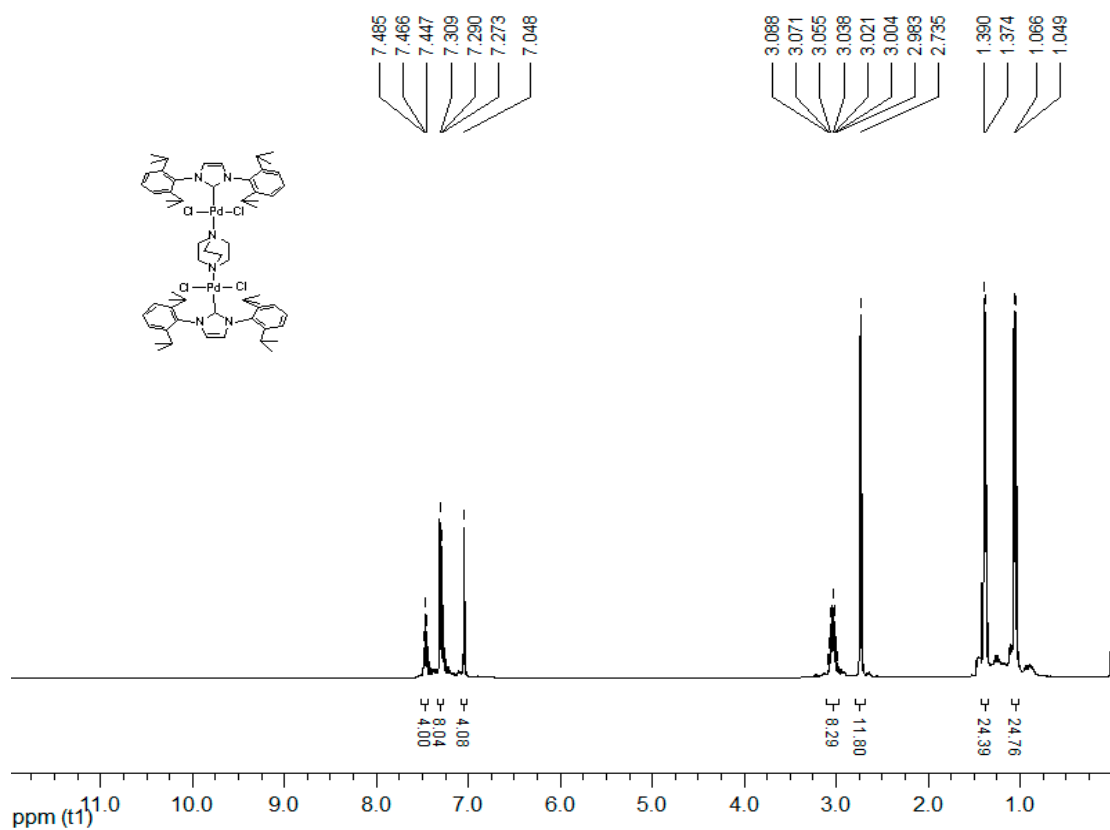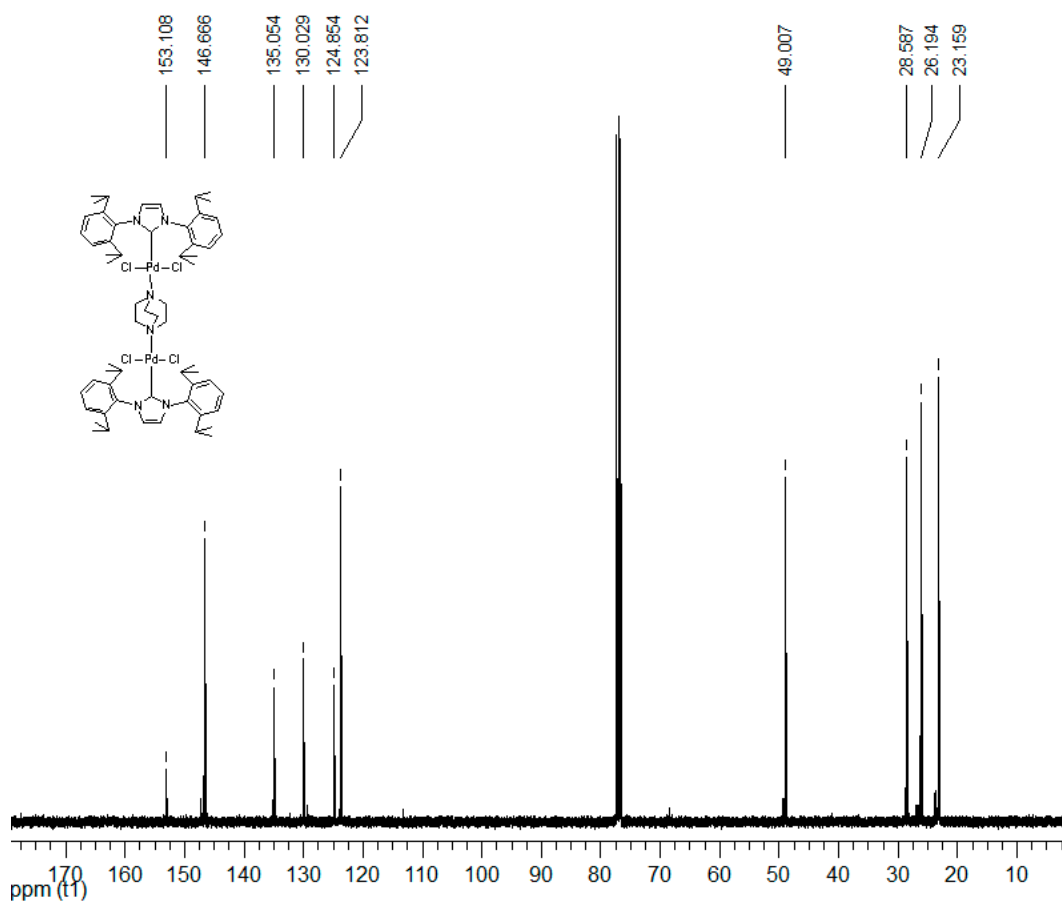

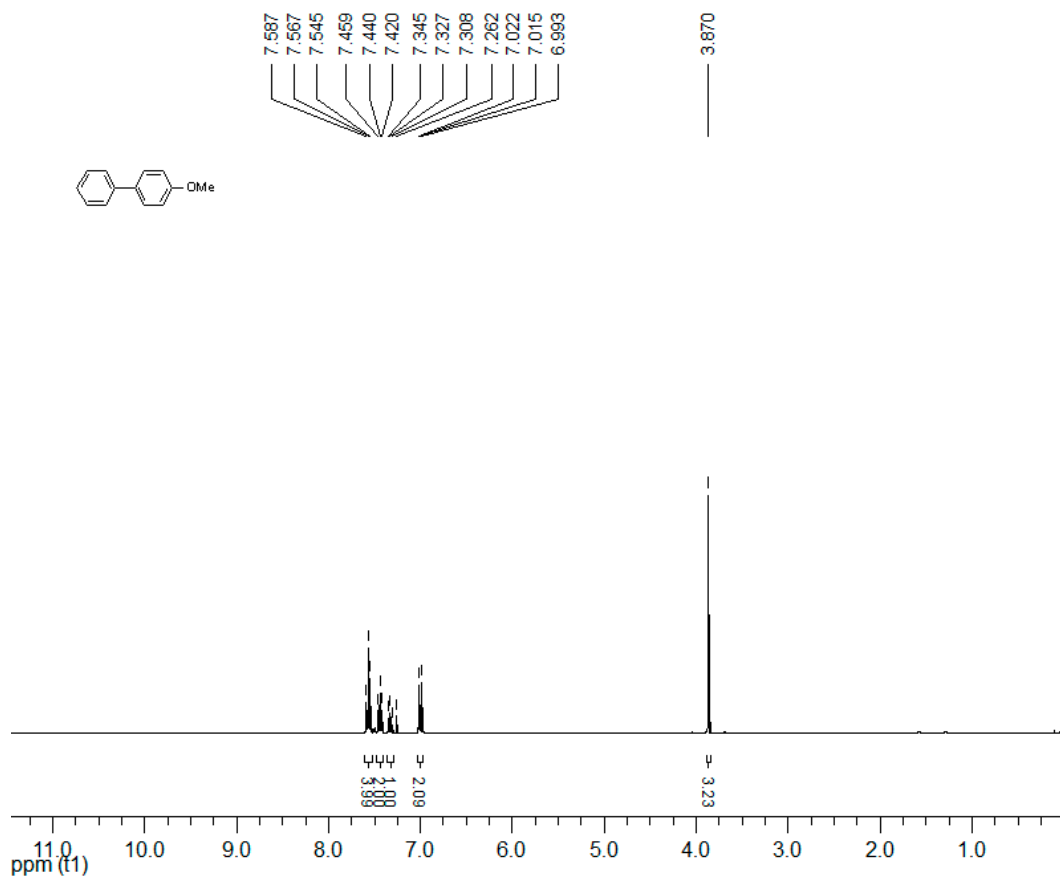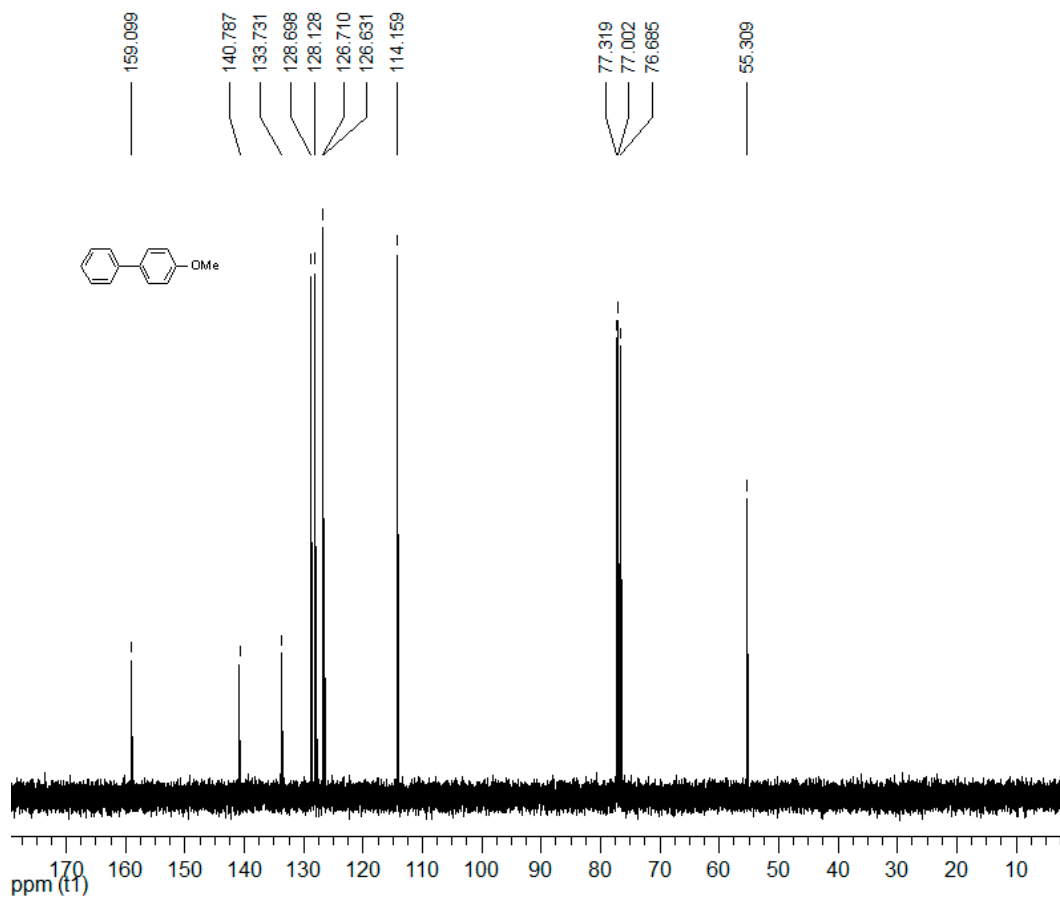

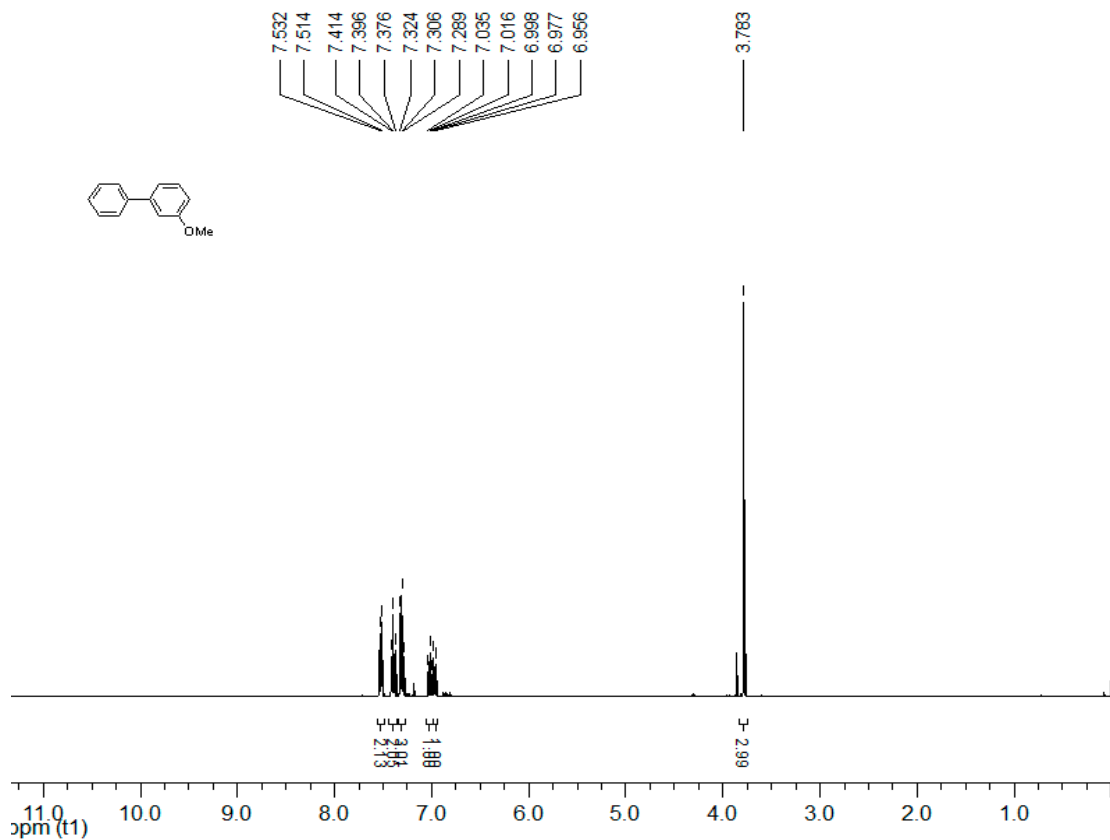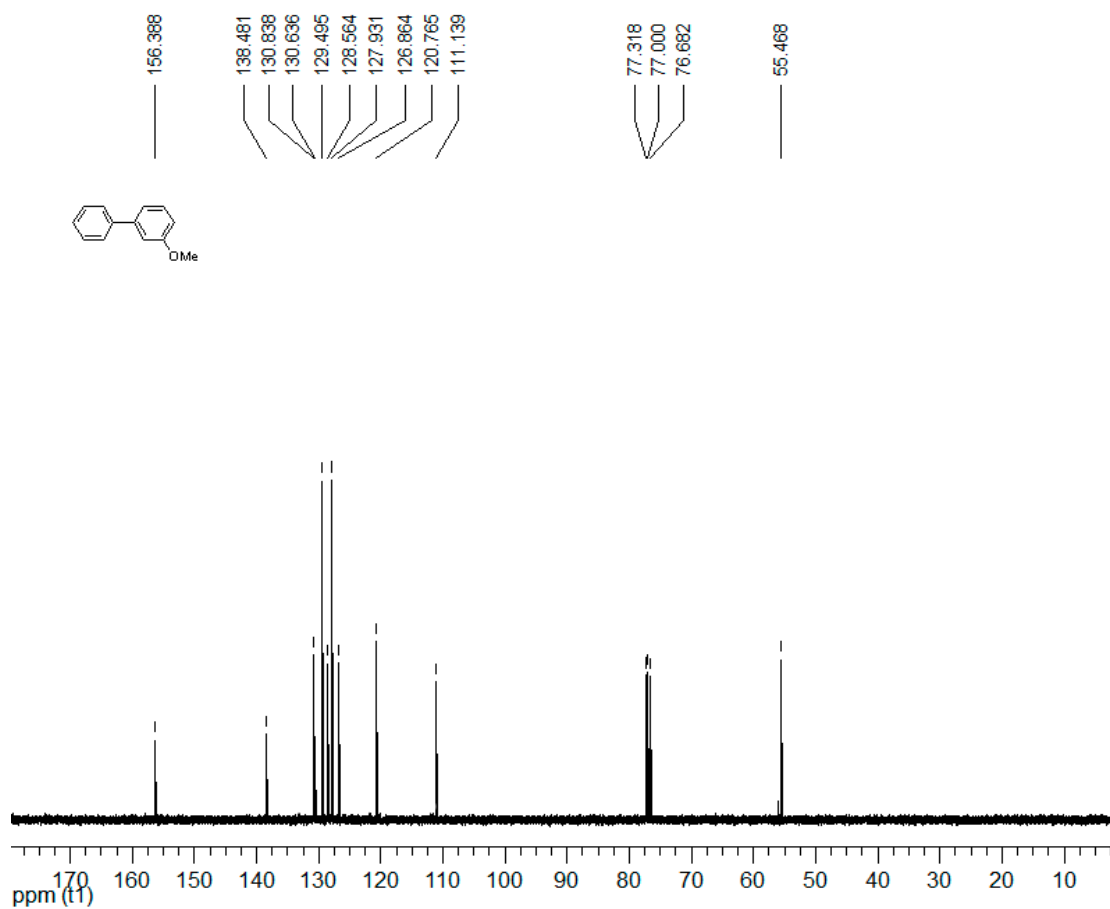

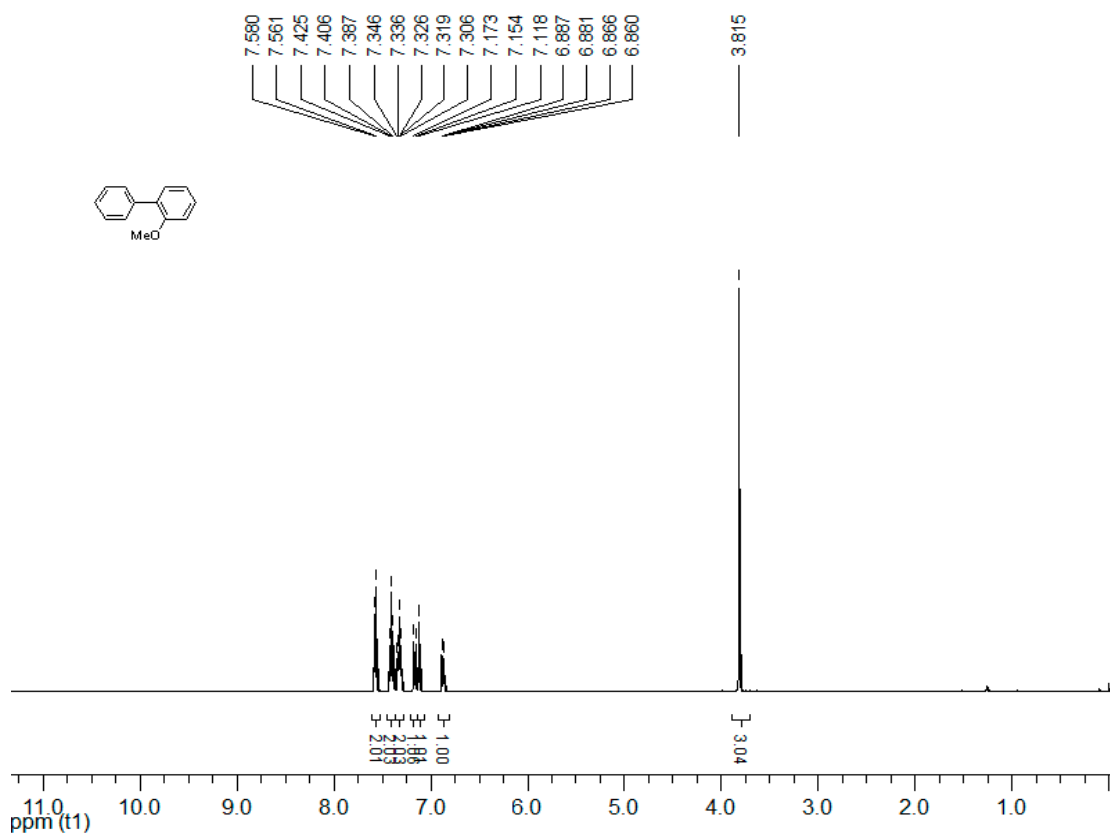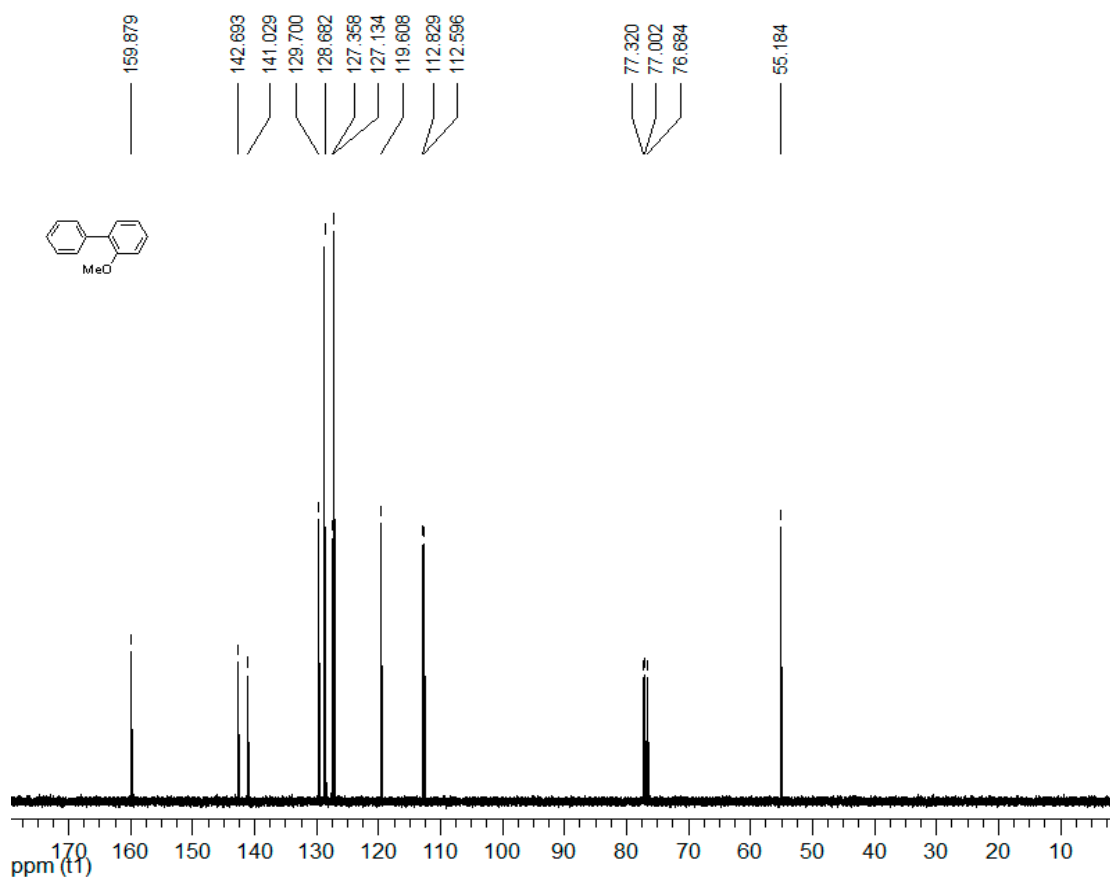

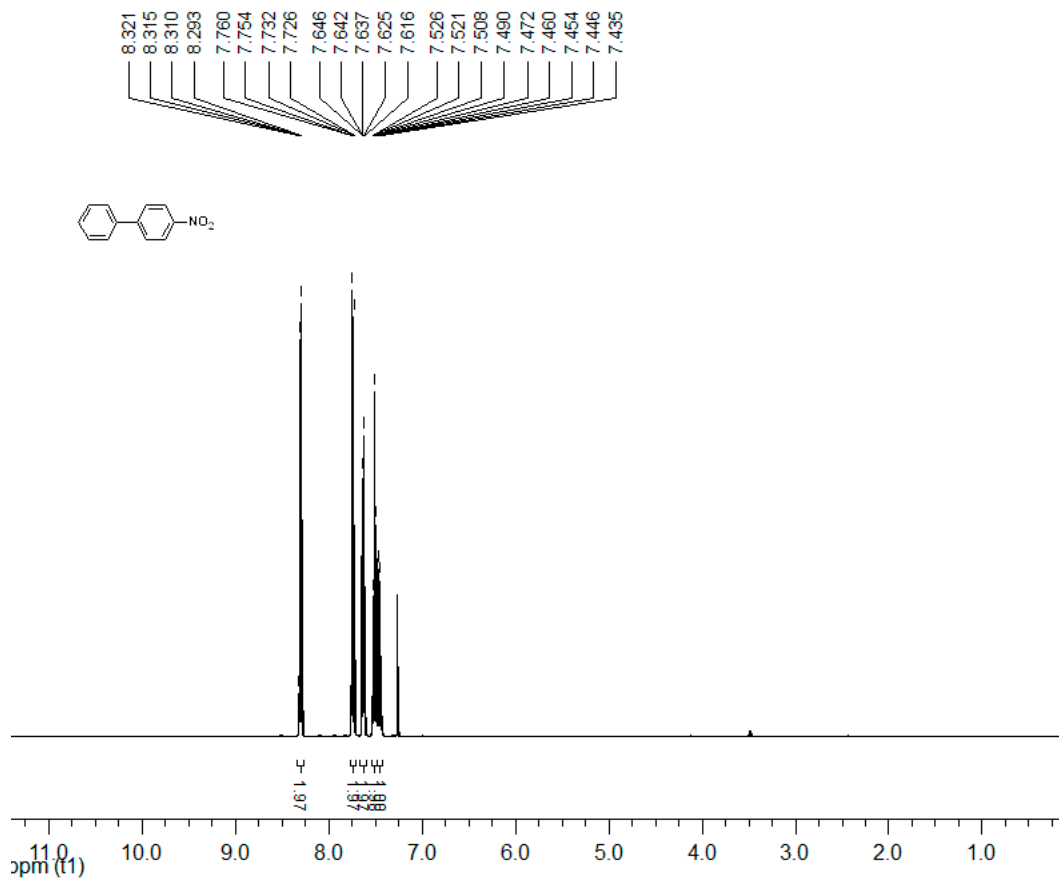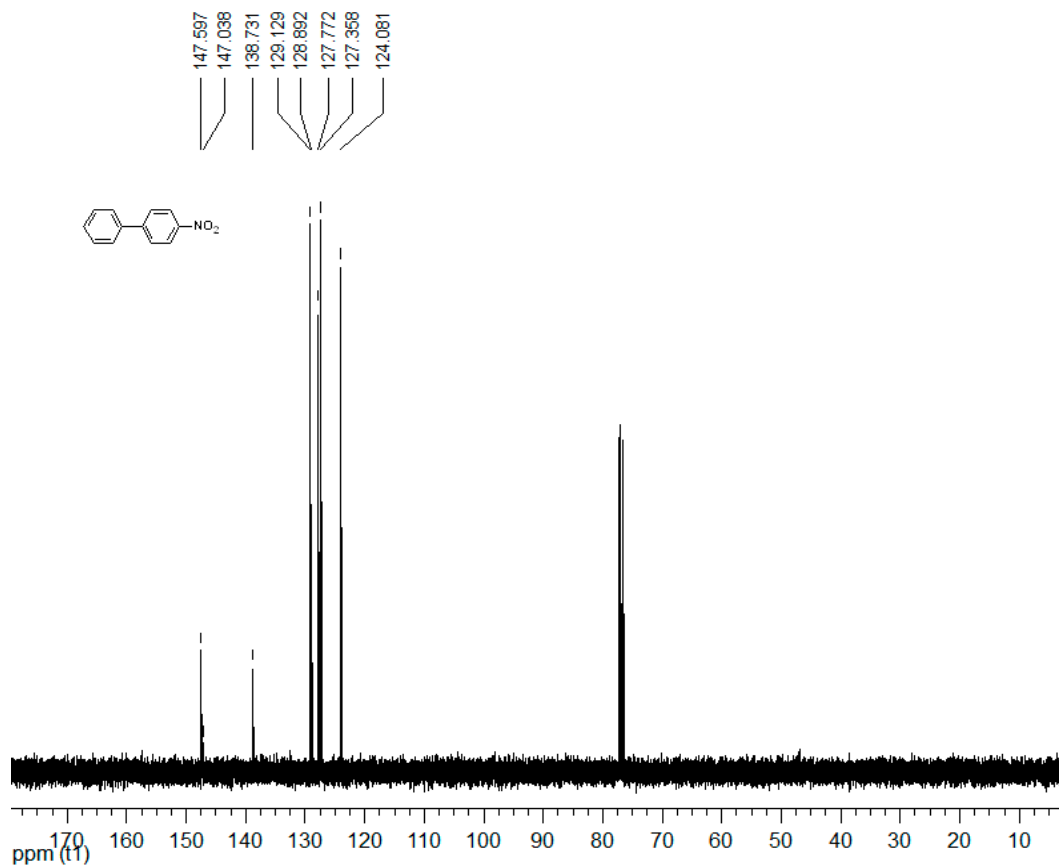

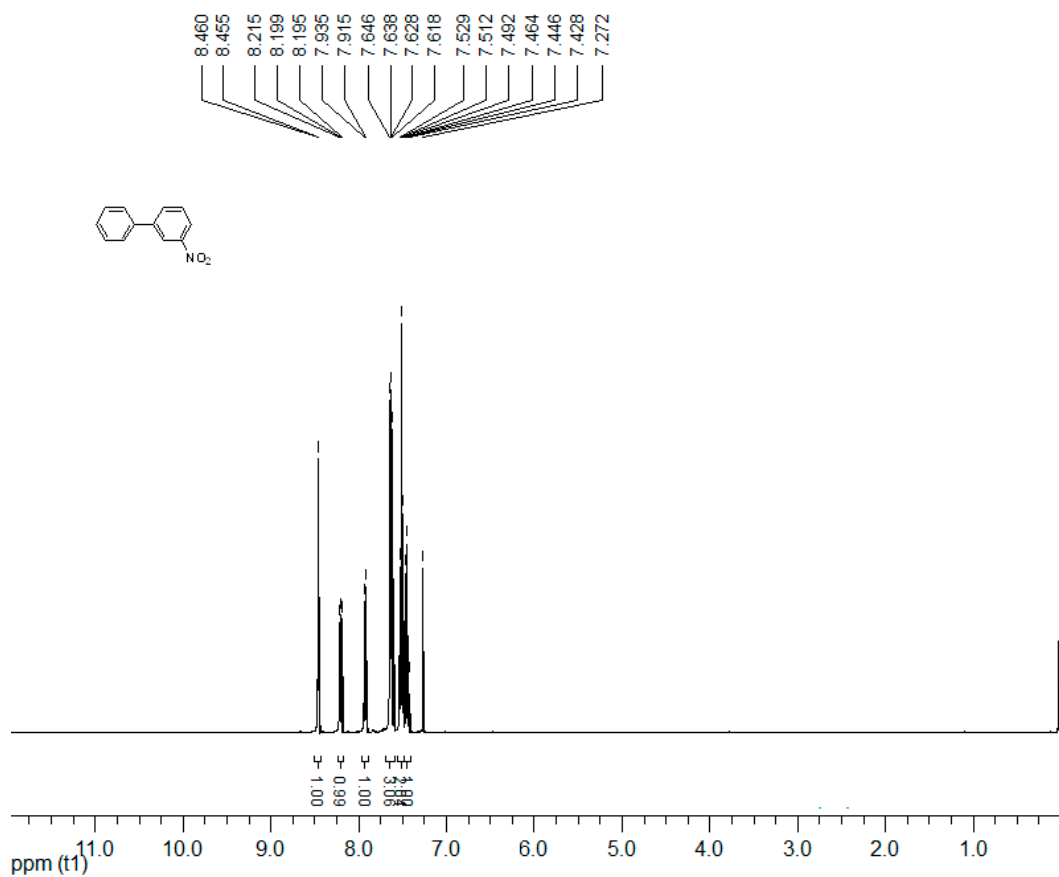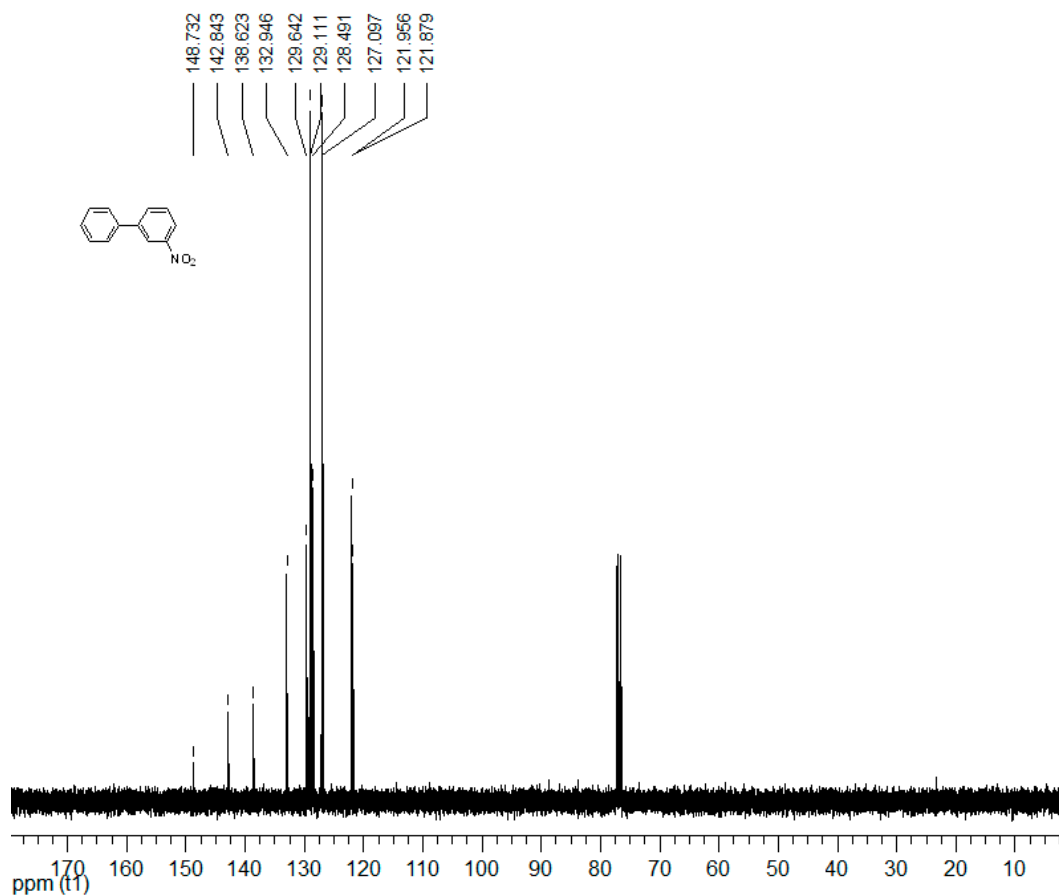



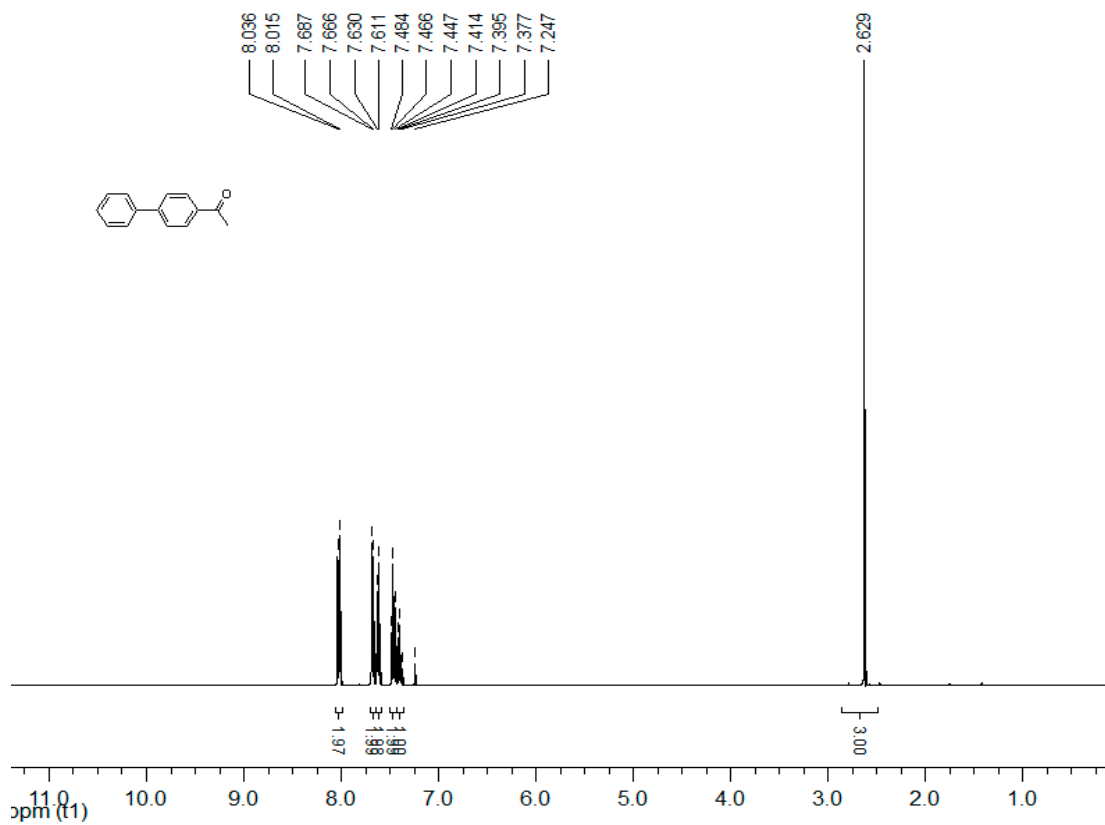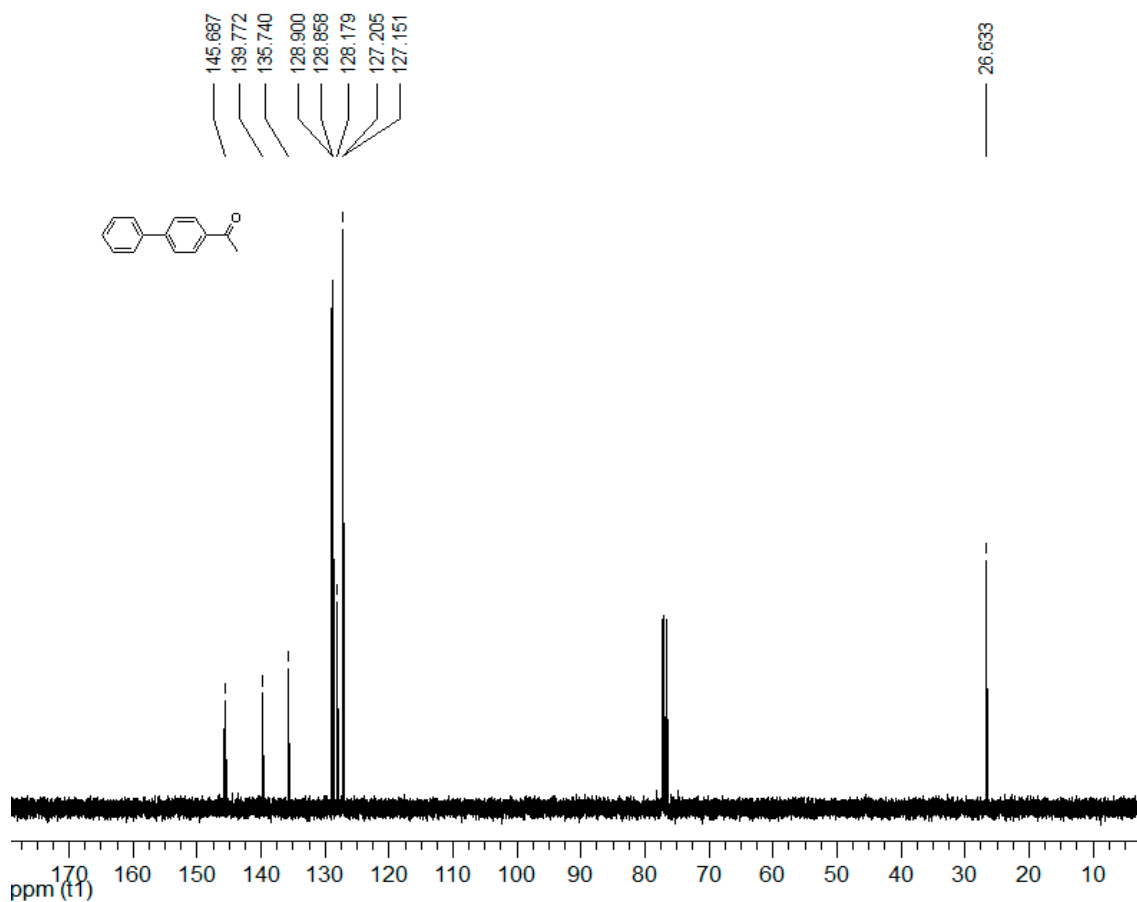



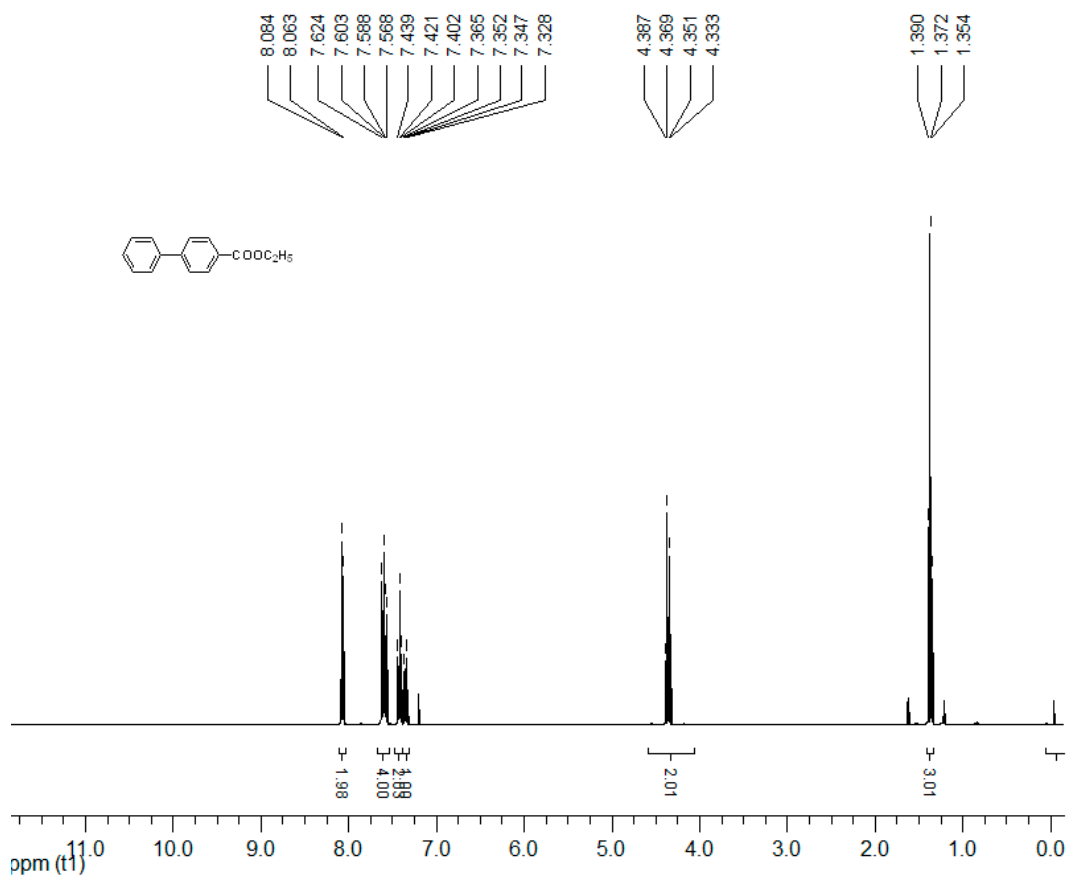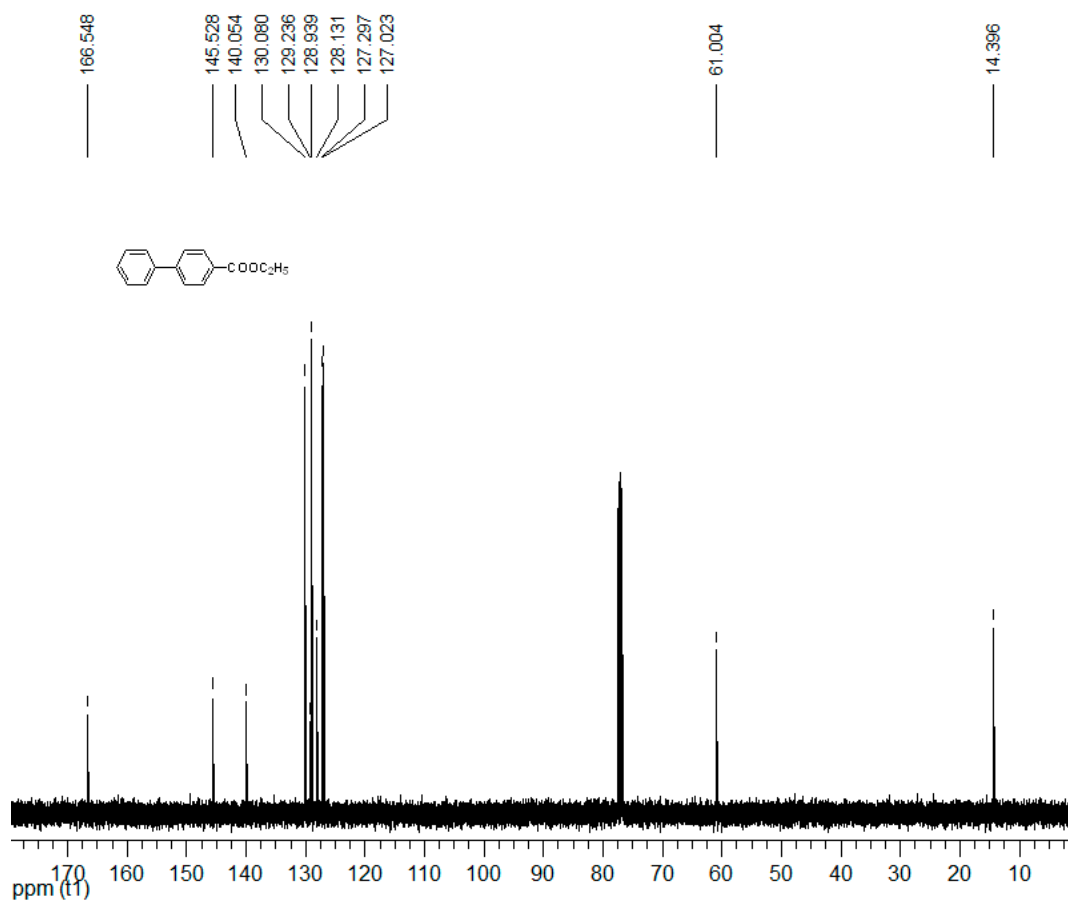



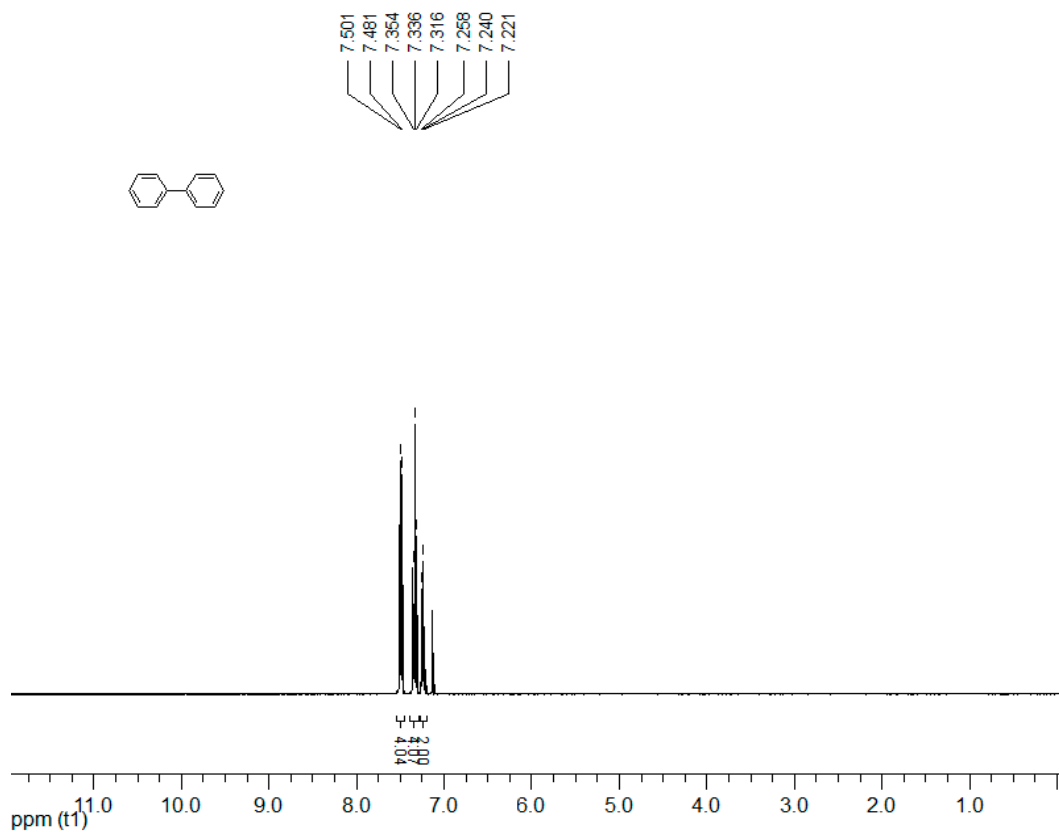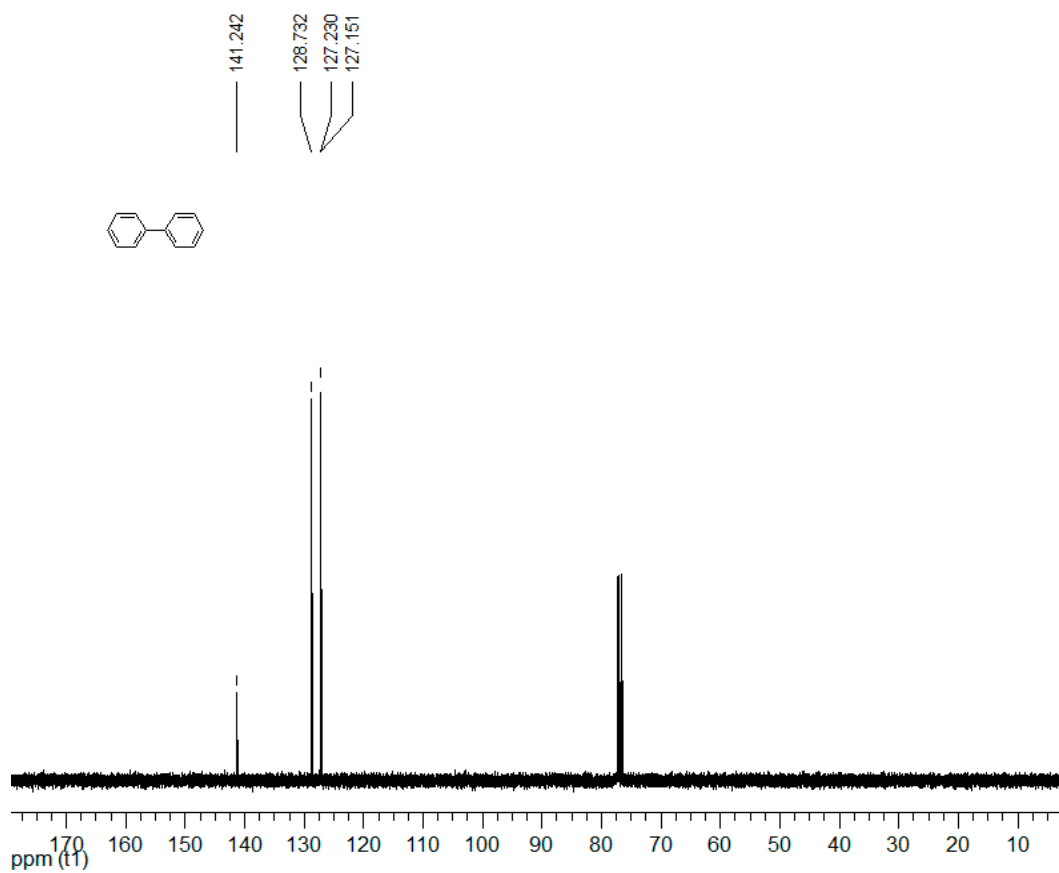



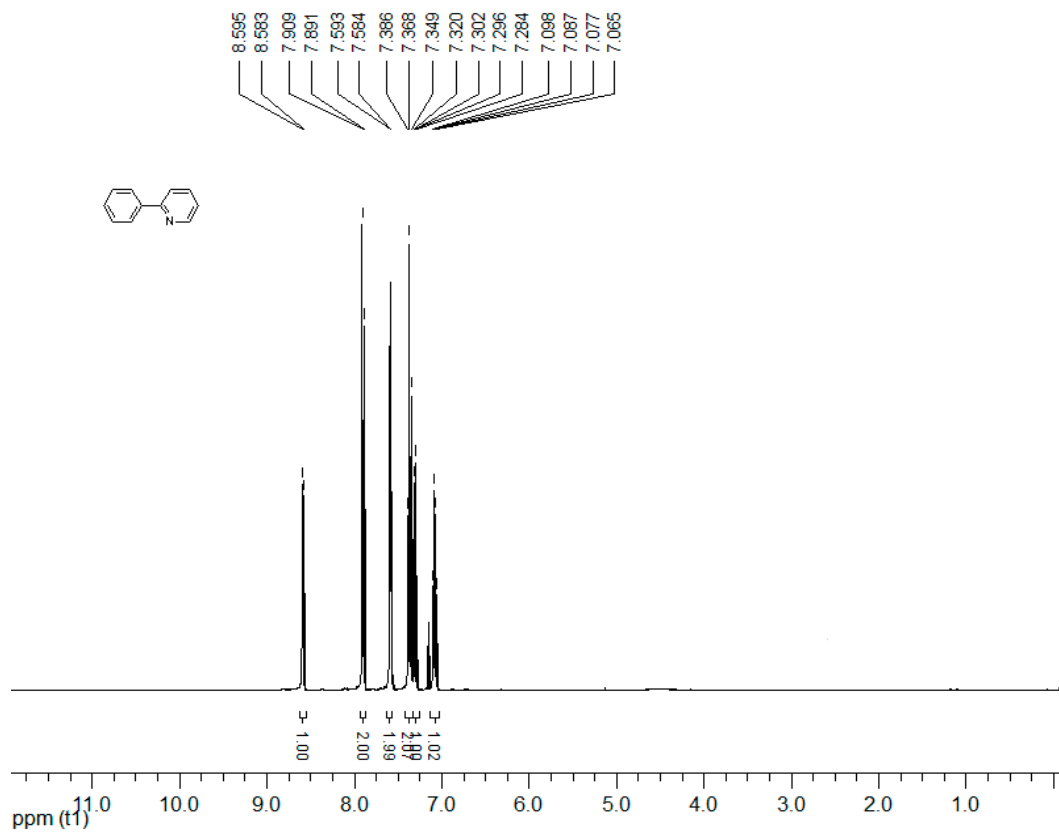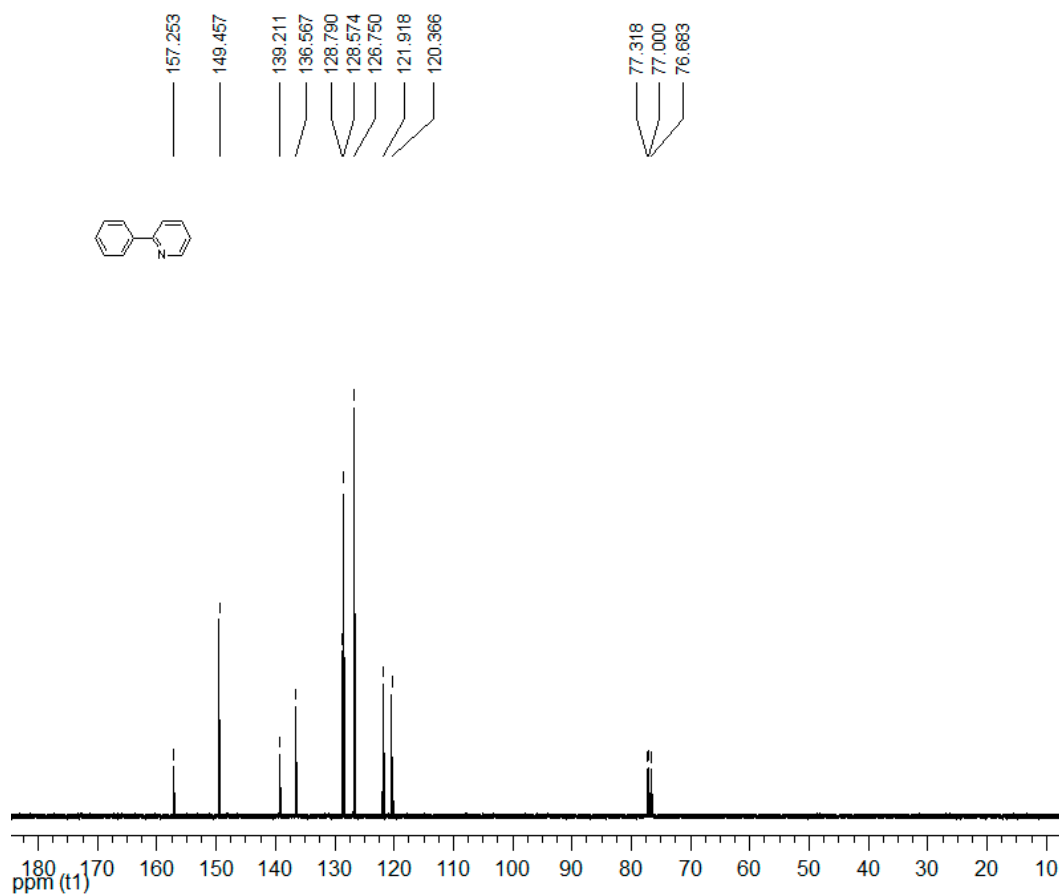

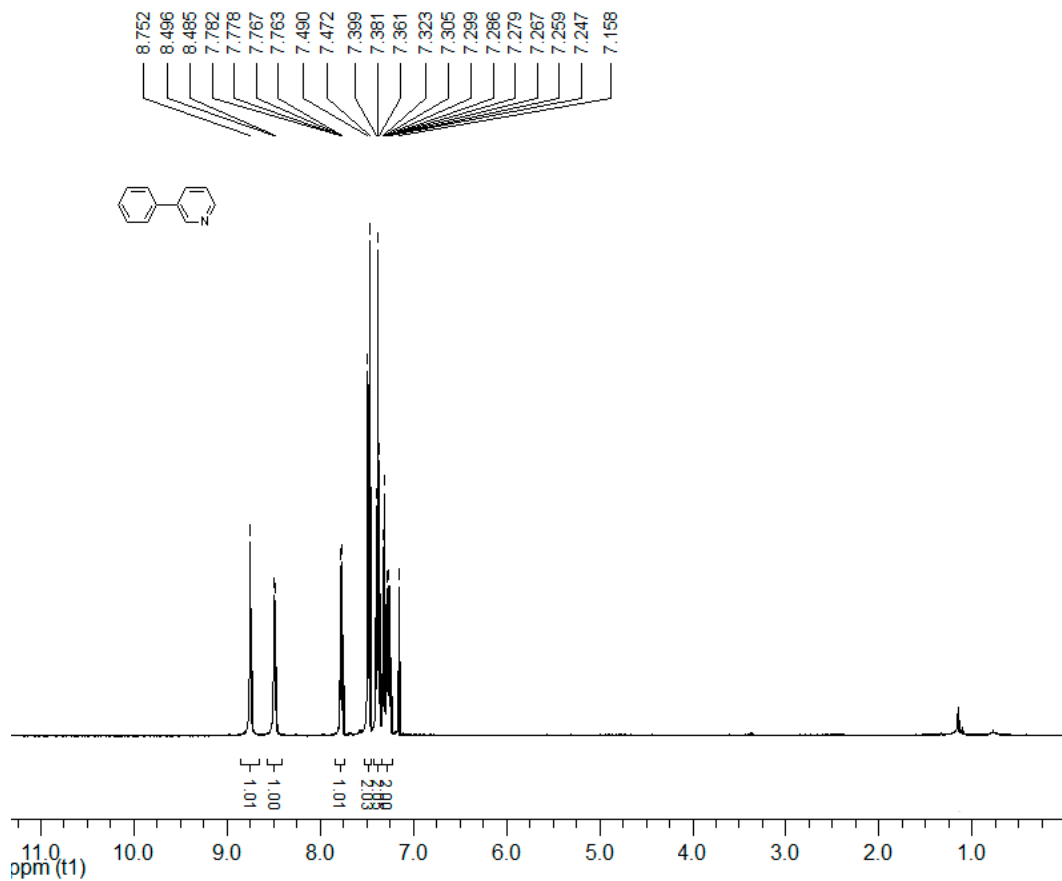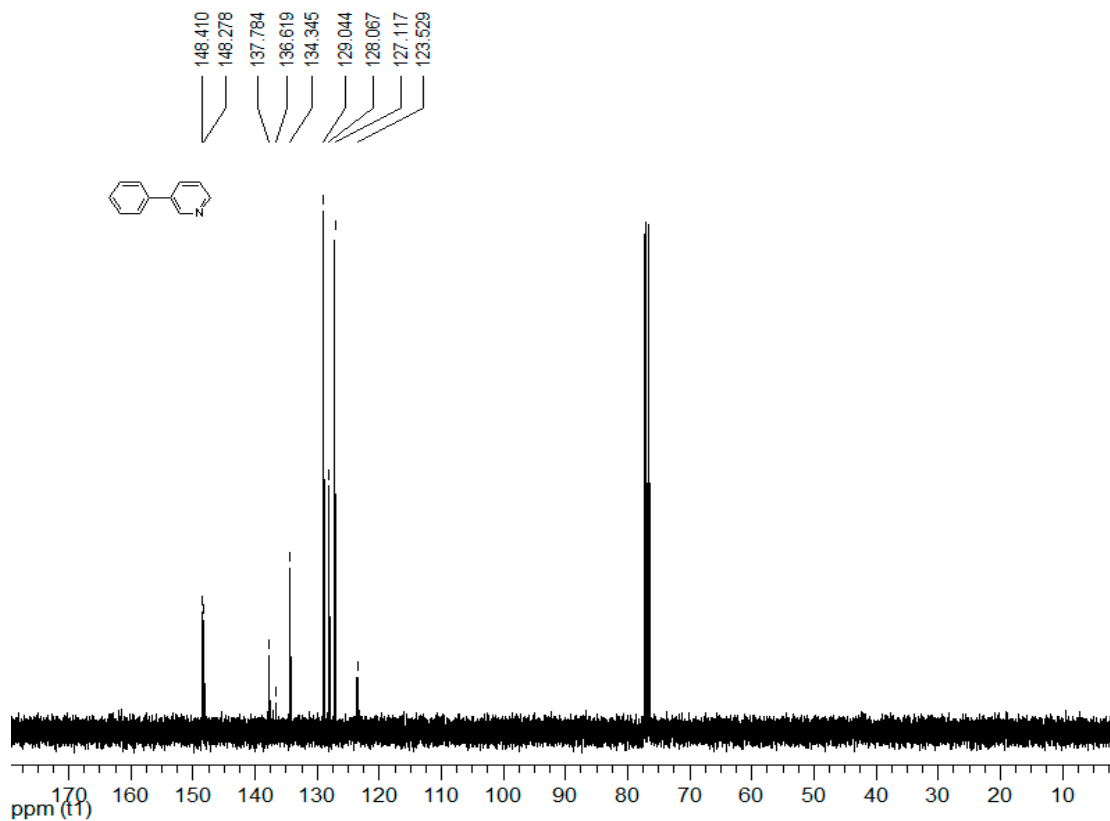

Supplement: c2dt31174g.pdf [file c2dt31174g.pdf]
